# Supplementary material
Source: HighWire-hosted journal article supplement (https://gut.bmj.com/content/67/1/28)
Supplement: inline-supplementary-material-1 [file inline-supplementary-material-1.pdf]

**eTable 1. ICD-9 codes for outcome and covariates**

| <b>Outcome</b>           |                                                                                                    |
|--------------------------|----------------------------------------------------------------------------------------------------|
| Gastric carcinoma        | 151, 151.0, 151.1, 151.2, 151.3, 151.4, 151.5, 151.6, 151.8, 151.9, 230.2                          |
| <b>Covariates</b>        |                                                                                                    |
| Smoking                  | 491, 492, 496, V15.82                                                                              |
| Alcohol                  | 291, 303, 305.0, 571.0, 571.1, 571.2, 571.3, 980.8, 980.9                                          |
| Gastric ulcer            | 531                                                                                                |
| Duodenal ulcer           | 532                                                                                                |
| Diabetes mellitus        | 249, 250                                                                                           |
| Hypertension             | 401-405                                                                                            |
| Dyslipidemia             | 272.0-272.4                                                                                        |
| Obesity                  | 278.0, 278.1                                                                                       |
| Ischemic heart disease   | 410-413, 414.0, 414.8, 414.9, 429.7                                                                |
| Atrial fibrillation      | 427.3                                                                                              |
| Congestive heart failure | 402.01, 402.11, 402.91, 404.01, 404.03, 404.11, 404.13, 404.91, 404.93, 428                        |
| Stroke                   | 430-432, 433.01, 433.11, 433.21, 433.31, 433.81, 433.91, 434.01, 434.11, 434.91, 436, 437.0, 437.1 |
| Chronic renal failure    | 585                                                                                                |
| Cirrhosis                | 571.2, 571.5, 571.6, 572.2-572.4, 573.5                                                            |

**eTable 2. Incidence rate of gastric cancer of PPIs users for each follow-up year**

|                                                 | 2 <sup>nd</sup> year | 3 <sup>rd</sup> year | 4 <sup>th</sup> year  | 5 <sup>th</sup> year  | 6 <sup>th</sup> year  | 7 <sup>th</sup> year |
|-------------------------------------------------|----------------------|----------------------|-----------------------|-----------------------|-----------------------|----------------------|
| <b>Number of GC cases</b>                       | 4                    | 3                    | 2                     | 1                     | 3                     | 1                    |
| <b>Number of persons at risk</b>                | 3,084                | 2,963                | 2,857                 | 2,567                 | 2,318                 | 2,054                |
| <b>Incidence rate (per 10,000 person-years)</b> | 13.0                 | 10.1                 | 7.0                   | 3.9                   | 12.9                  | 4.9                  |
|                                                 | 8 <sup>th</sup> year | 9 <sup>th</sup> year | 10 <sup>th</sup> year | 11 <sup>th</sup> year | 12 <sup>th</sup> year |                      |
| <b>Number of GC cases</b>                       | 1                    | 2                    | 1                     | 0                     | 1                     |                      |
| <b>Number of persons at risk</b>                | 1,758                | 1,446                | 1,126                 | 813                   | 540                   |                      |
| <b>Incidence rate (per 10,000 person-years)</b> | 5.7                  | 13.8                 | 8.9                   | 0                     | 18.5                  |                      |

\* There were no gastric cancer cases within the first year of *H. pylori* eradication therapy since these patients were excluded in the current study  
PPIs, proton pump inhibitors; GC, gastric cancer

**eTable 3. HRs and 95% CIs for the association between PPIs use (frequency and duration) and risk of gastric cancer (multivariable analysis)**

|                        |      | Dose-response relationship<br>(n=63,397, GC=153) |  |              |
|------------------------|------|--------------------------------------------------|--|--------------|
| PPIs frequency         | HR   | 95% CI                                           |  | p-value      |
| Non-user (<weekly use) | Ref  | -                                                |  | -            |
| Weekly to <daily       | 2.08 | 1.29 – 3.61                                      |  | <b>0.002</b> |
| Daily                  | 3.23 | 0.98 – 10.60                                     |  | 0.054        |

  

| PPIs frequency         | PPIs use ≥ 1 year<br>(n=56,592, GC=128) |              |         | PPIs use ≥ 2 years<br>(n=54,958, GC=104) |              |         | PPIs use ≥ 3 years<br>(n=53,900, GC=85) |              |              |
|------------------------|-----------------------------------------|--------------|---------|------------------------------------------|--------------|---------|-----------------------------------------|--------------|--------------|
|                        | HR                                      | 95% CI       | p-value | HR                                       | 95% CI       | p-value | HR                                      | 95% CI       | p-value      |
| Non-user (<weekly use) | Ref                                     | -            | -       | Ref                                      | -            | -       | Ref                                     | -            | -            |
| Weekly to <daily       | 1.28                                    | 0.64 – 2.52  | 0.490   | 0.71                                     | 0.25 – 2.01  | 0.521   | 0.27                                    | 0.04 – 2.03  | 0.205        |
| Daily                  | 3.07                                    | 0.92 – 10.29 | 0.068   | 3.34                                     | 0.98 – 11.39 | 0.054   | 4.22                                    | 1.23 – 14.49 | <b>0.022</b> |

Significant p-values were highlighted in bold  
HR, hazard ratio; 95% CI, 95% confidence interval; PPIs, proton pump inhibitors; GC, gastric cancer

**eTable 4. HRs and 95% CIs for the association between PPIs use (frequency and duration) and risk of gastric cancer (propensity score adjustment without trimming)**

| PPIs frequency         | Dose-response relationship<br>(n=63,397, GC=153) |              |              |
|------------------------|--------------------------------------------------|--------------|--------------|
|                        | HR                                               | 95% CI       | p-value      |
| Non-user (<weekly use) | Ref                                              | -            | -            |
| Weekly to <daily       | 2.00                                             | 1.15 – 3.48  | <b>0.015</b> |
| Daily                  | 3.71                                             | 1.13 – 12.20 | <b>0.031</b> |

  

| PPIs frequency         | PPIs use ≥ 1 year<br>(n=56,592, GC=128) |              |              | PPIs use ≥ 2 years<br>(n=54,958, GC=104) |              |              | PPIs use ≥ 3 years<br>(n=53,900, GC=85) |              |              |
|------------------------|-----------------------------------------|--------------|--------------|------------------------------------------|--------------|--------------|-----------------------------------------|--------------|--------------|
|                        | HR                                      | 95% CI       | p-value      | HR                                       | 95% CI       | p-value      | HR                                      | 95% CI       | p-value      |
| Non-user (<weekly use) | Ref                                     | -            | -            | Ref                                      | -            | -            | Ref                                     | -            | -            |
| Weekly to <daily       | 1.32                                    | 0.66 – 2.64  | 0.432        | 0.75                                     | 0.26 – 2.13  | 0.582        | 0.30                                    | 0.04 – 2.22  | 0.236        |
| Daily                  | 3.83                                    | 1.14 – 12.83 | <b>0.029</b> | 4.41                                     | 1.28 – 15.23 | <b>0.019</b> | 5.46                                    | 1.52 – 19.57 | <b>0.009</b> |

Significant p-values were highlighted in bold  
\* PPIs non-user was defined as <weekly use in subsequent analysis as there was no significant difference between <monthly use and monthly to <weekly use  
HR, hazard ratio; 95% CI, 95% confidence interval; PPIs, proton pump inhibitors; GC, gastric cancer

**eFigure 1. Study observation period**

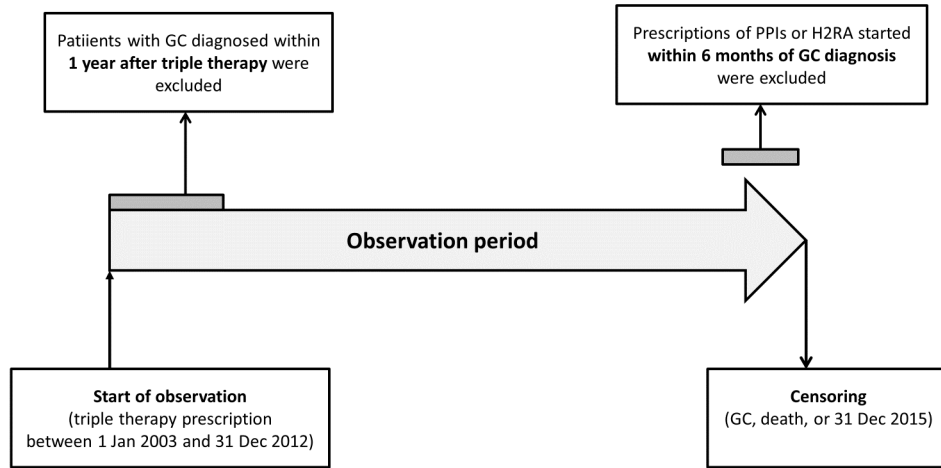

Abbreviations: GC, gastric cancer; PPIs, proton pump inhibitors; H2RA, histamine 2 receptor antagonist
